# Supplementary material
Source: publisher figshare collection journal article supplement (https://brill.figshare.com/ndownloader/files/17785535)
Supplement: Supplementary file 1 [file 17785535]

**Rooting of cuttings of *Passiflora suberosa*, a medicinal passion fruit species: characterization and modulation by external biochemical factors**

Johnatan Vilasboa, Cibele Tesser da Costa, Hélio Nitta Matsuura and Arthur Germano Fett-Neto

Plant Physiology Laboratory, Center for Biotechnology and Department of Botany, Federal University of Rio Grande do Sul (UFRGS), CP 15005, Porto Alegre, RS, 91501-970, Brazil

**ARTICLE HISTORY**

Received 1 July 2019

Accepted 12 September 2019

**CONTACT** Arthur Germano Fett-Neto E-mail: fettneto@cbiot.ufrgs.br

**Supplementary material**

**Table S1.** Rooting percentage of *Passiflora suberosa* cuttings under three different IBA concentrations. DAE = days after exposure.

| IBA concentration (ppm) | Rooting (%) |        |        |        |
|-------------------------|-------------|--------|--------|--------|
|                         | 9 DAE       | 12 DAE | 15 DAE | 18 DAE |
| 0                       | 56          | 83     | 100    | 100    |
| 0.1                     | 78          | 94     | 100    | 100    |
| 1                       | 61          | 94     | 94     | 89     |

**Table S2.** Rooting percentage of *Passiflora suberosa* cuttings under four modulation treatments. DAE = days after exposure.

| Condition                    | Rooting (%) |        |
|------------------------------|-------------|--------|
|                              | 11 DAE      | 13 DAE |
| T1<br>(no IBA, unmodulated)  | 42          | 59     |
| T2<br>(IBA, unmodulated)     | 67          | 95     |
| T3<br>(no IBA, up-modulated) | 40          | 53     |
| T4<br>(IBA, down-modulated)  | 0           | 0      |
